# Supplementary material for: Carbamazepine Enhances Adipogenesis by Inhibiting Wnt/β-Catenin Expression
Source: PubMed Central journal article supplement (PMC6912407; doi:10.3390/cells8111460), 2019-11-18
Supplement: cells-08-01460-s001.pdf [file cells-08-01460-s001.pdf]

## Supplementary Figures

### Carbamazepine Enhances Adipogenesis by Inhibiting Wnt/ $\beta$ -catenin Expression

Dong Uk Im<sup>1,2</sup>, Sang Chon Kim<sup>2</sup>, Gia Cac Chau<sup>1</sup>, and Sung Hee Um<sup>1,2,3,\*</sup>

<sup>1</sup> Department of Molecular Cell Biology, Samsung Biomedical Research Institute, Sungkyunkwan University School of Medicine, Suwon, Gyeonggi-do 16419, Korea; [ldw4545@gmail.com](mailto:ldw4545@gmail.com) (D.I.); [chaugiacac@gmail.com](mailto:chaugiacac@gmail.com) (G.C.)

<sup>2</sup> Department of Health Sciences and Technology, Samsung Advanced Institute for Health Sciences and Technology, Samsung Medical Center, Sungkyunkwan University, Seoul 06351, Korea; [karls22@nate.com](mailto:karls22@nate.com) (S.K.)

<sup>3</sup> Biomedical Institute Convergence at Sungkyunkwan University, Suwon, Gyeonggi-do, 16419, Korea

\* Correspondence: [shum@skku.edu](mailto:shum@skku.edu); Tel: +82-31-299-6123, Fax: +82-31-299-6109

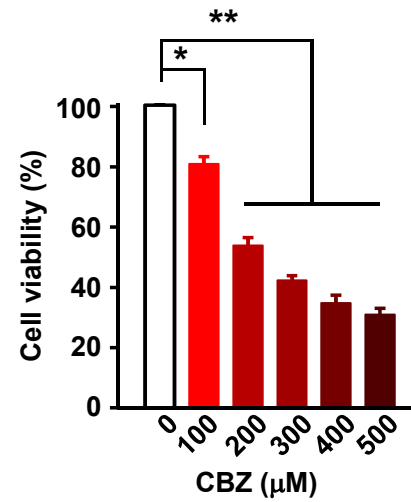

**Figure S1. Effect of carbamazepine on the viability in 3T3-L1 cells.**

Cell viability of 3T3-L1 cells treated with carbamazepine at various concentration for 24 h was analyzed by MTT assay (n = 3 per group). *t*-test, Values are mean ± SEM. \*,  $P < 0.05$ ; \*\*,  $P < 0.01$ .

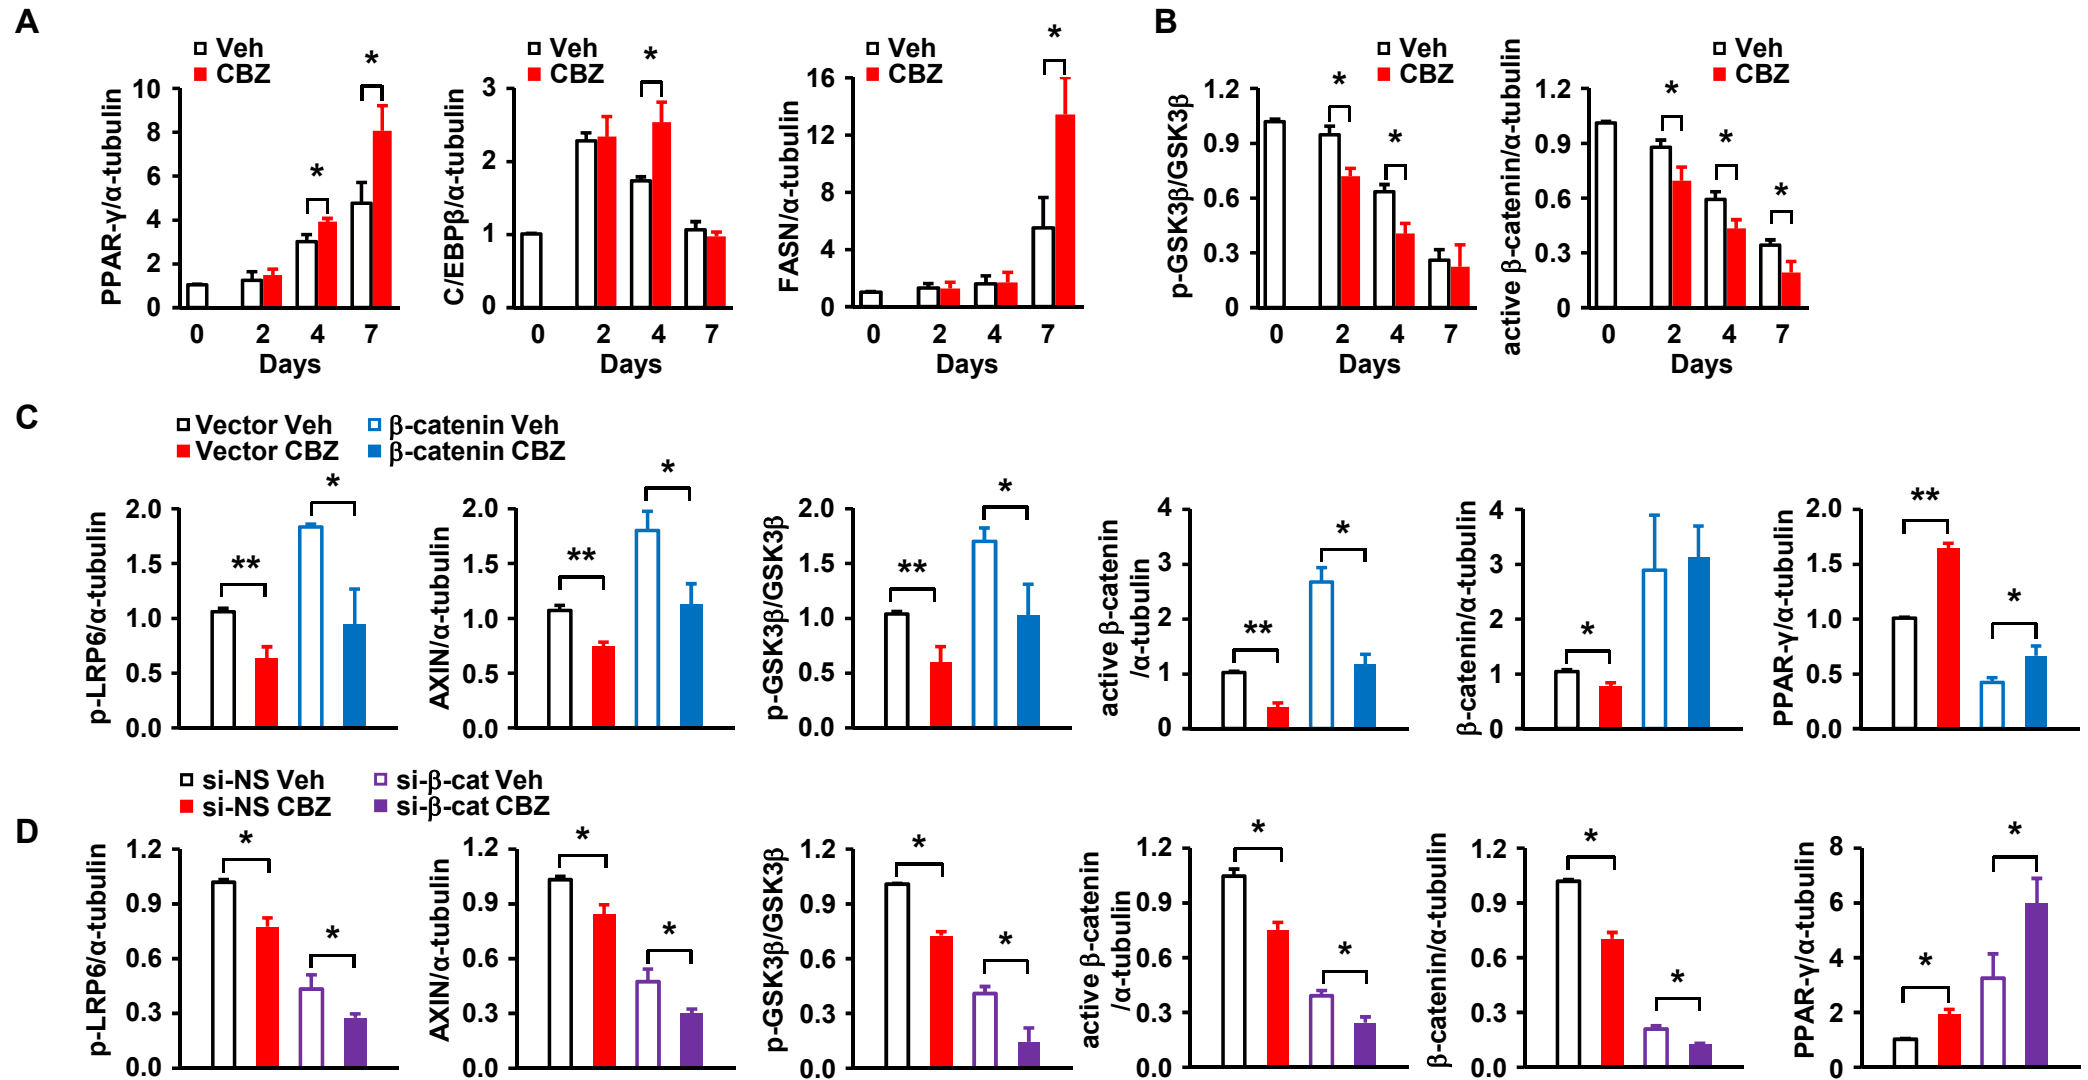

**Figure S2. Quantification of western blot data.**

Quantification of western blots from three independent experiments was performed using Image J software. Quantification analysis of (A) The relative levels of PPAR $\gamma$ / $\alpha$ -tubulin, C/EBP $\beta$ / $\alpha$ -tubulin and FASN/ $\alpha$ -tubulin in Figure 1E (n=3 per group). (B) The relative levels of p-GSK3 $\beta$ /total GSK3 $\beta$  and active  $\beta$ -catenin/ $\alpha$ -tubulin in Figure 3B (n=3 per group). (C) The relative levels of p-LRP6/ $\alpha$ -tubulin, AXIN/ $\alpha$ -tubulin, p-GSK3 $\beta$ /total GSK3 $\beta$ , active  $\beta$ -catenin/ $\alpha$ -tubulin,  $\beta$ -catenin/ $\alpha$ -tubulin and PPAR $\gamma$ / $\alpha$ -tubulin in Figure 4C (n=3 per group). (D) The relative levels of p-LRP6/ $\alpha$ -tubulin, AXIN/ $\alpha$ -tubulin, p-GSK3 $\beta$ /total GSK3 $\beta$ , active  $\beta$ -catenin/ $\alpha$ -tubulin,  $\beta$ -catenin/ $\alpha$ -tubulin and PPAR $\gamma$ / $\alpha$ -tubulin in Figure 5C (n=3 per group). *t*-test, Values are mean  $\pm$  SEM. \*, *P* < 0.05; \*\*, *P* < 0.01.

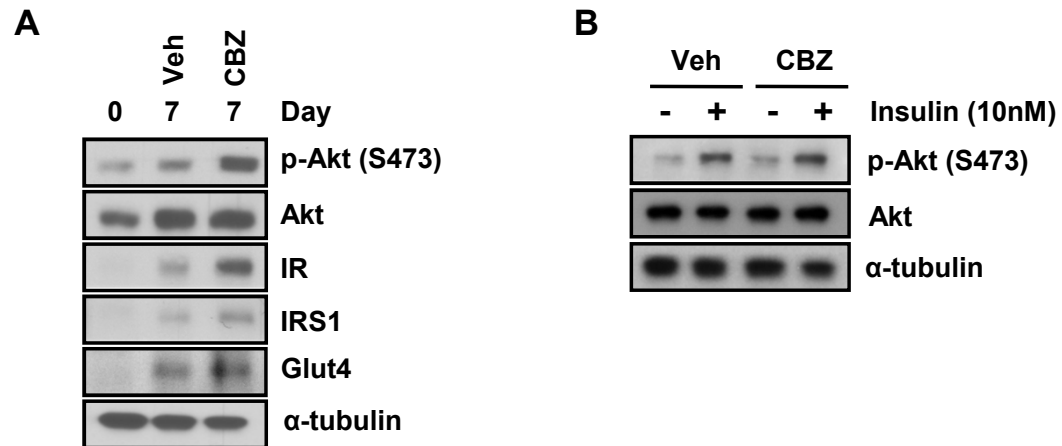

**Figure S3. Carbamazepine does not affect insulin-induced Akt phosphorylation in differentiated adipocytes.**

(A) Protein levels of insulin signaling after carbamazepine treatment during adipocyte differentiation. (B) Immunoblots showing insulin-induced phosphorylation of Akt in mature adipocytes after carbamazepine treatment for 30 min.
